# Supplementary material for: Probing the gating mechanism of the mechanosensitive channel Piezo1 with the small molecule Yoda1
Source: PubMed Central journal article supplement (PMC5966384; doi:10.1038/s41467-018-04405-3), 2018-05-23
Supplement: 41467_2018_4405_MOESM1_ESM.pdf [file 41467_2018_4405_MOESM1_ESM.pdf]

**Probing the Gating Mechanism of the Mechanosensitive Channel Piezo1 with  
the Small Molecule Yoda1**

Lacroix et al.

## Supplementary Figures

**F1961**

hPZ1 E-KRPSRSGRRVRAAGRRLQGFCLSLAQGTYRPLRRFFHFDILHTKYRAATDVYALMFLADVDFIIIIIFGFWAFGKHS  
mPZ1 HTQEKSFREREMKAAGRRLQSFCVSLAQSFYQPLQRFFHFDILHTKYRAATDVYALMFLADIVDIIIIIFGFWAFGKHS  
hPZ2 -----ELYMEKQLQEHLIKAKAFTIKKTLLEIYVPIKQFFYNLIHPEYSAVTDVYVLMFLADTVDFIIIVFGFWAFGKHS  
mPZ2 -----ELYMEKQLQEHLIKAKAFTIKKTLQIYVPIRQFFYDLIHPDYSAVTDVYVLMFLADTVDFIIIVFGFWAFGKHS  
\* \* \* \* \* \* \* \* \*

**T2005** **R2035** **F2063**

hPZ1 AATDITSSLSDDQVPEAFLVMLLIQFSTMVVDRALYLRKTVLGKLAQVALVLAIHLMWFFILPAVTERMFNQNVVAQ  
mPZ1 AATDIASSLSDDQVPQAFLLVQFGTMVIDRALYLRKTVLGKLAQVVLVVAIHIWVFFILPAVTERMFNSQNAVAQ  
hPZ2 AAADITSSLSSEDQVPGPFLVMVLIQFGTMVVDRALYLRKTVLGKVIQVILVFGIHFWMFFILPGVTERKFSQNLVAQ  
mPZ2 AAADITSSLSSEDQVPGPFLVMVLIQFGTMVVDRALYLRKTVLGKVIQVILVFGIHFWMFFILPGVTERKFSQNLVAQ  
\* \* \* \* \* \* \* \* \*

hPZ1 LWYFVKCIYFALSAYQIRCGYPTRILGNFLTCKYNHNLNLFQGFRLVPFLVELRAVMDVWVWTDTTLSLSSWMCVEDI  
mPZ1 LWYFVKCIYFALSAYQIRCGYPTRILGNFLTCKYNHNLNLFQGFRLVPFLVELRAVMDVWVWTDTTLSLSSNWMCVEDI  
hPZ2 LWYFVKCVYFGLSAYQIRCGYPTRVLGNFLTCKSYNVNLFQGFRLVPFLTELRAVMDVWVWTDTTLSLSSWICVEDI  
mPZ2 LWYFVKCVYFGLSAYQIRCGYPTRVLGNFLTCKSYNVNLFQGFRLVPFLTELRAVMDVWVWTDTTLSLSSWICVEDI

hPZ1 YANIFI IKCSRETEKKYPQPKGQKKKKIVKYGMGGLIILFLIAI IWFPLL FMSLVR SVVGVVNQPIDVTVTLKLGGE  
mPZ1 YANIFI IKCSRETEKKYPQPKGQKKKKIVKYGMGGLIILFLIAI IWFPLL FMSLIR SVVGVVNQPIDVTVTLKLGGE  
hPZ2 YAHIFILKWCWRESEKRYPPRGQKKKKVVKYGMGMIIVLLICIVWFPLL FMSLIK SVAGVINQPLDVSVTITLGGYQ  
mPZ2 YAHIFILKWCWRESEKRYPPRGQKKKKAVVKYGMGMIIVLLICIVWFPLL FMSLIK SVAGVINQPLDVSVTITLGGYQ

**P2456**

hPZ1 PLFTMSAQQPSIIPFTAQAYEELSRQFDPQPLAMQFISQYSPEDIVTAQIEGSSGALWRISPPSRAQMKRELYNGTAD  
mPZ1 PLFTMSAQQPSIIPFPTQAYEELSQQFDPYPLAMQFISQYSPEDIVTAQIEGSSGALWRISPPSRAQMKQELYNGTAD  
hPZ2 PIFTMSAQQSQKVMDDQSFNKFIAFSDRTGAMQFLENYEKEDITVAELEGNSNSLWTISPPSKQKMIHELDPNSS  
mPZ2 PIFTMSAQQSQKVMDNSKYNEFLKSFGPSNGAMQFLENYEREDVTVAELEGNSNSLWTISPPSKQKMIQELTDPNSC

hPZ1 ITLRF TWNFQRDLAKGGTVEYANEKHMALAPNSTARRQLASLLEGTSDQ----SVVIPNLF PKYIRAPNGPEANPVK  
mPZ1 ITLRF TWNFQRDLAKGGTVEYTNEKHTLELAPNSTARRQLAQLLEGRPDQ----SVVIPHLF PKYIRAPNGPEANPVK  
hPZ2 FSVVFSWSIQRNLSLGAKEIATDKLSFPLK--NITRKNIAKMIAGNSTESSKTPVTIEKIYPYVVKAPSDSNSKPIK  
mPZ2 FSVVFSWSIQRNMTLGAKAEIATDKLSFPLA--VATRNSIAKMIAGNDTESNTPVTIEKIYPYVVKAPSDSNSKPIK

hPZ1 QLQPNEEADYLGVRIQLRREQGA-----GATGFLEWVWVIELQECR---TDCNLLPMVIFSDKVSPPSLGFLAG  
mPZ1 QLQPDEEEDYLGVRIQLRREQVGTGASGEQAGTKASDFLEWVWVIELQDCK---ADCNLLPMVIFSDKVSPPSLGFLAG  
hPZ2 QLLS--ENNFM DIT IILSRDNTTKY-----NSEWVWLNLTGNRIYNPNSQALELVVFNKVSPPSLGFLAG  
mPZ2 QLLS--ENNFMNIT IILFRDNVTKS-----NSEWVWLNLTGSRIFNQGSQALELVVFNKVSPPSLGFLAG

hPZ1 YGIMGLYVSIVLVIGKVFVRGFFSEISHSIMFEELPCVDRIKLCQDIFLVRETRELELEEEELYAKLIFLYRSPETMIK  
mPZ1 YGIVGLYVSIVLVVGKVFVRGFFSEISHSIMFEELPCVDRIKLCQDIFLVRETRELELEEEELYAKLIFLYRSPETMIK  
hPZ2 YGIMGLYASVVLVIGKVFVREFFSGISHSIMFEELPNVDRIKLCQDIFLVRETGELELEEDLYAKLIFLYRSPETMIK  
mPZ2 YGIMGLYASVVLVIGKVFVREFFSGISHSIMFEELPNVDRIKLCQDIFLVRETGELELEEDLYAKLIFLYRSPETMIK

hPZ1 WTREKE-  
mPZ1 WTRERE-  
hPZ2 WTREKTN  
mPZ2 WTREKTN

**Supplementary Figure 1: Sequence alignment (T-coffee) of the C-terminal region of mouse Piezo1 (mPZ1), Piezo2 (mPZ2) and human Piezo1 (hPZ1) and Piezo2 (hPZ2).** The residues that are numbered and shaded correspond to positions used to create the chimeras and sub-domain chimeras. Asterisks indicate residues within the 1961-2063 region that are overall not conserved between Piezo1 and Piezo2.

## Supplementary Tables

**Supplementary Table 1: Fitted parameters for the I / I<sub>max</sub> vs. Pressure plots using equation 1**

|                        | mPZ1            | mPZ1 + 30 $\mu$ M Yoda1 | Chim            | Chim + 30 $\mu$ M Yoda1 |
|------------------------|-----------------|-------------------------|-----------------|-------------------------|
| k (mmHg)               | 9.46 $\pm$ 0.64 | 10.78 $\pm$ 1.51        | 5.73 $\pm$ 0.47 | 5.95 $\pm$ 0.48         |
| P <sub>50</sub> (mmHg) | -52 $\pm$ 1     | -26 $\pm$ 1             | -62 $\pm$ 1     | -63 $\pm$ 1             |
| R <sup>2</sup>         | 0.988           | 0.952                   | 0.980           | 0.979                   |

**Supplementary Table 2: Fitted parameters for different gating models**

| Number of activated subunits needed for pore opening |                           | $\geq 1$             | $\geq 2$            | 3                   |
|------------------------------------------------------|---------------------------|----------------------|---------------------|---------------------|
| fitting equation from main text                      |                           | 2                    | 3                   | 4                   |
| Syeda et al.                                         | B <sub>max</sub>          | 2069.85 $\pm$ 100.69 | 1818.63 $\pm$ 48.79 | 1836.90 $\pm$ 55.18 |
|                                                      | K <sub>d</sub> ( $\mu$ M) | 22.92 $\pm$ 2.95     | 10.83 $\pm$ 0.76    | 4.13 $\pm$ 0.32     |
|                                                      | R <sup>2</sup>            | 0.993                | 0.996               | 0.995               |
| this study                                           | B <sub>max</sub>          | 1.67 $\pm$ 0.07      | 1.50 $\pm$ 0.08     | 1.49 $\pm$ 0.08     |
|                                                      | K <sub>d</sub> ( $\mu$ M) | 10.92 $\pm$ 1.44     | 5.20 $\pm$ 0.85     | 1.89 $\pm$ 0.32     |
|                                                      | R <sup>2</sup>            | 0.980                | 0.954               | 0.948               |

**Supplementary Table 3: Fitted parameters of I / I<sub>max</sub> plots for WT and WT:Chim = 1:1 in presence of varying Yoda1 concentrations using equation 1.**

| [Yoda1] ( $\mu$ M) | WT             |                        |                | WT:Chim = 1:1  |                        |                |
|--------------------|----------------|------------------------|----------------|----------------|------------------------|----------------|
|                    | k (mmHg)       | P <sub>50</sub> (mmHg) | R <sup>2</sup> | k (mmHg)       | P <sub>50</sub> (mmHg) | R <sup>2</sup> |
| 1                  | 10.2 $\pm$ 0.7 | -44.4 $\pm$ 0.8        | 0.996          | 9.3 $\pm$ 1.0  | -40 $\pm$ 1.1          | 0.991          |
| 3                  | 10.4 $\pm$ 0.7 | -36.4 $\pm$ 0.8        | 0.988          | 9.9 $\pm$ 1.1  | -36 $\pm$ 0.8          | 0.991          |
| 10                 | 10.9 $\pm$ 0.7 | -31.2 $\pm$ 0.8        | 0.988          | 9.6 $\pm$ 1.1  | -27 $\pm$ 0.8          | 0.956          |
| 30                 | 10.3 $\pm$ 0.7 | -25.7 $\pm$ 0.7        | 0.985          | 11.3 $\pm$ 1.3 | -20 $\pm$ 0.6          | 0.908          |
| 100                | 6.9 $\pm$ 0.6  | -16.9 $\pm$ 0.6        | 0.976          | 13 $\pm$ 1.3   | -18 $\pm$ 0.9          | 0.940          |

## Supplementary Note 1

The measured fluorescence  $F$  is a function of the saturation function  $\nu$  of the protein  $P$  by the agonist ligand  $L$ , of the background fluorescence  $q$  and of a constant  $b_{\max}$ :

$$F = q + (b_{\max} \nu) \quad (1)$$

Before addition of the ligand ( $t = 0$ ),  $\nu = 0$  and thus  $F_0 = q$ . The relative change of fluorescence follows:

$$\frac{F - F_0}{F_0} = \frac{(q + (b_{\max} \nu)) - q}{q} = \frac{b_{\max}}{q} \nu = B_{\max} \nu \quad (2)$$

with  $B_{\max} = b_{\max} / q$ . In case of multiple binding sites per protein, the saturation function equals the total concentration of bound ligand ( $[L]_{\text{bound}}$ ) over the total concentration of protein ( $[P]_0$ ):

$$\nu = \frac{[L]_{\text{bound}}}{[P]_0} \quad (3)$$

Assuming each subunit of the trimeric channel interacts independently with the agonist:

$$\frac{[L]_{\text{bound}}}{[P]_0} = \frac{[PL] + 2[PL_2] + 3[PL_3]}{[P] + [PL] + [PL_2] + [PL_3]} \quad (4)$$

The different protein species are related by the corresponding macroscopic dissociation constant  $K_1$ ,  $K_2$  and  $K_3$  corresponding to each binding step:

$$K_1 = \frac{[P][L]}{[PL]} ; K_2 = \frac{[PL][L]}{[PL_2]} ; K_3 = \frac{[PL_2][L]}{[PL_3]}$$

By replacing the macroscopic constants:

$$\nu = \frac{\frac{[L]}{K_1} + \frac{2[L]}{K_1 K_2} + \frac{3[L]}{K_1 K_2 K_3}}{1 + \frac{[L]}{K_1} + \frac{[L]}{K_1 K_2} + \frac{[L]}{K_1 K_2 K_3}} \quad (5)$$

The macroscopic constants are related to the microscopic dissociation constant  $K_d$  by the number of possible binding combinations  $\Omega_{n,i}$  for each binding step  $i$  and for  $n$  binding sites:

$$K_i = \frac{\Omega_{n,i-1}}{\Omega_{n,i}} K_d = \frac{\binom{n}{i-1}}{\binom{n}{i}} = \frac{i}{n-i+1} K_d$$

Replacing the macroscopic constants by the  $K_d$  gives and using  $n = 3$  for a trimeric channel:

$$v = \frac{\frac{3[L]}{K_d} + \frac{6[L]^2}{K_d^2} + \frac{3[L]^3}{K_d^3}}{1 + \frac{3[L]}{K_d} + \frac{3[L]^2}{K_d^2} + \frac{[L]^3}{K_d^3}} \quad (6)$$

Supplementary Equation 6 further simplifies by applying a binomial reduction:

$$v = \frac{3[L]}{K_d + [L]} \quad (7)$$

Assuming the activation of one or more subunit is sufficient for channel opening, every species in the numerator of Supplementary Equation 6 contribute to the observed fluorescence signal:

$$\frac{F - F_0}{F_0} = B_{\max} \frac{3[L]}{K_d + [L]} \quad (8)$$

However, if the activation of two or three subunits is required for channel activation, the fraction of channel with a single activated subunit does not contribute to the signal. In this case, the fluorescence signal follows:

$$\frac{F - F_0}{F_0} = B_{\max} \frac{\frac{6[L]^2}{K_d^2} + \frac{3[L]^3}{K_d^3}}{1 + \frac{3[L]}{K_d} + \frac{3[L]^2}{K_d^2} + \frac{[L]^3}{K_d^3}} \quad (9)$$

Similarly, if the activation of three subunits is necessary for channel activation, the fluorescence signal follows:

$$\frac{F - F_0}{F_0} = B_{\max} \frac{\frac{3[L]^3}{K_d^3}}{1 + \frac{3[L]}{K_d} + \frac{3[L]^2}{K_d^2} + \frac{[L]^3}{K_d^3}} \quad (10)$$
