# Supplementary material for: Probing the gating mechanism of the mechanosensitive channel Piezo1 with the small molecule Yoda1
Source: PubMed Central journal article supplement (PMC5966384; doi:10.1038/s41467-018-04405-3), 2018-05-23
Supplement: 41467_2018_4405_MOESM3_ESM.pdf [file 41467_2018_4405_MOESM3_ESM.pdf]

## Description of Additional Supplementary Files

**File Name:** Supplementary Movie 1

**Description:** Time-lapse calcium imaging of Yoda1-mediated Piezo1 activation. HEK293T cells co-expressing GCaMP6m and mPiezo1 were imaged for one minute at 1 frame s<sup>-1</sup> under epifluorescence illumination. 100  $\mu$ M Yoda1 was added at t = 10 s. The images are displayed in the movie at 5 frames s<sup>-1</sup>.

**File Name:** Supplementary Movie 2

**Description:** Yoda1-mediated calcium signals are Piezo1-dependent. HEK293T cells expressing GCaMP6m were imaged for one minute at 1 frame s<sup>-1</sup> under epifluorescence illumination. 100  $\mu$ M Yoda1 was added at t = 10 s. The images are displayed in the movie at 5 frames s<sup>-1</sup>.
